# Supplementary material for: METTL1 promotes neuroblastoma development through m7G tRNA modification and selective oncogenic gene translation
Source: PubMed Central journal article supplement (PMC9454133; doi:10.1186/s40364-022-00414-z), 2022-09-07

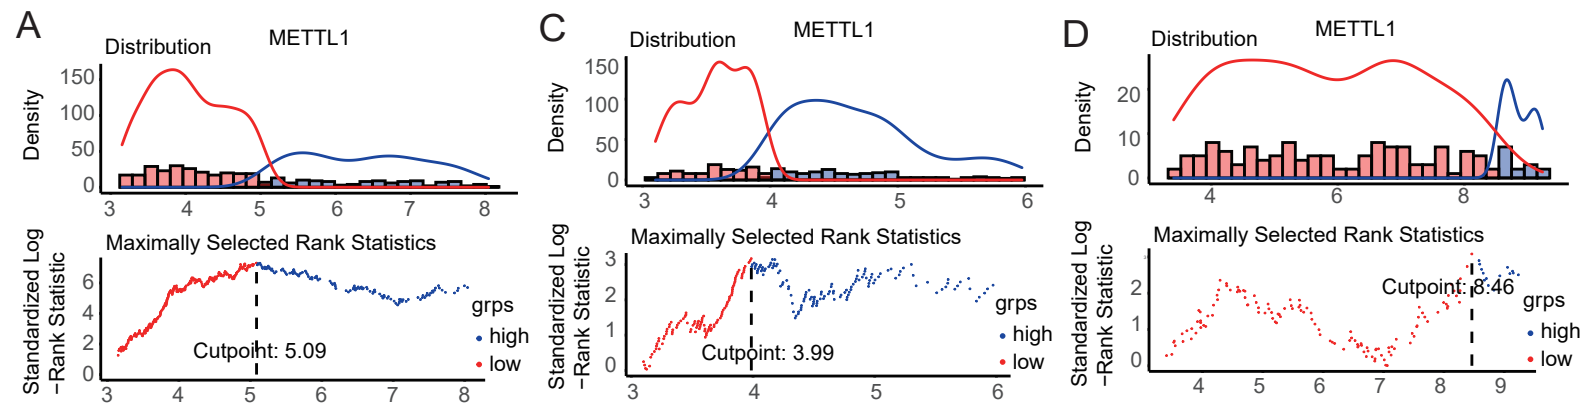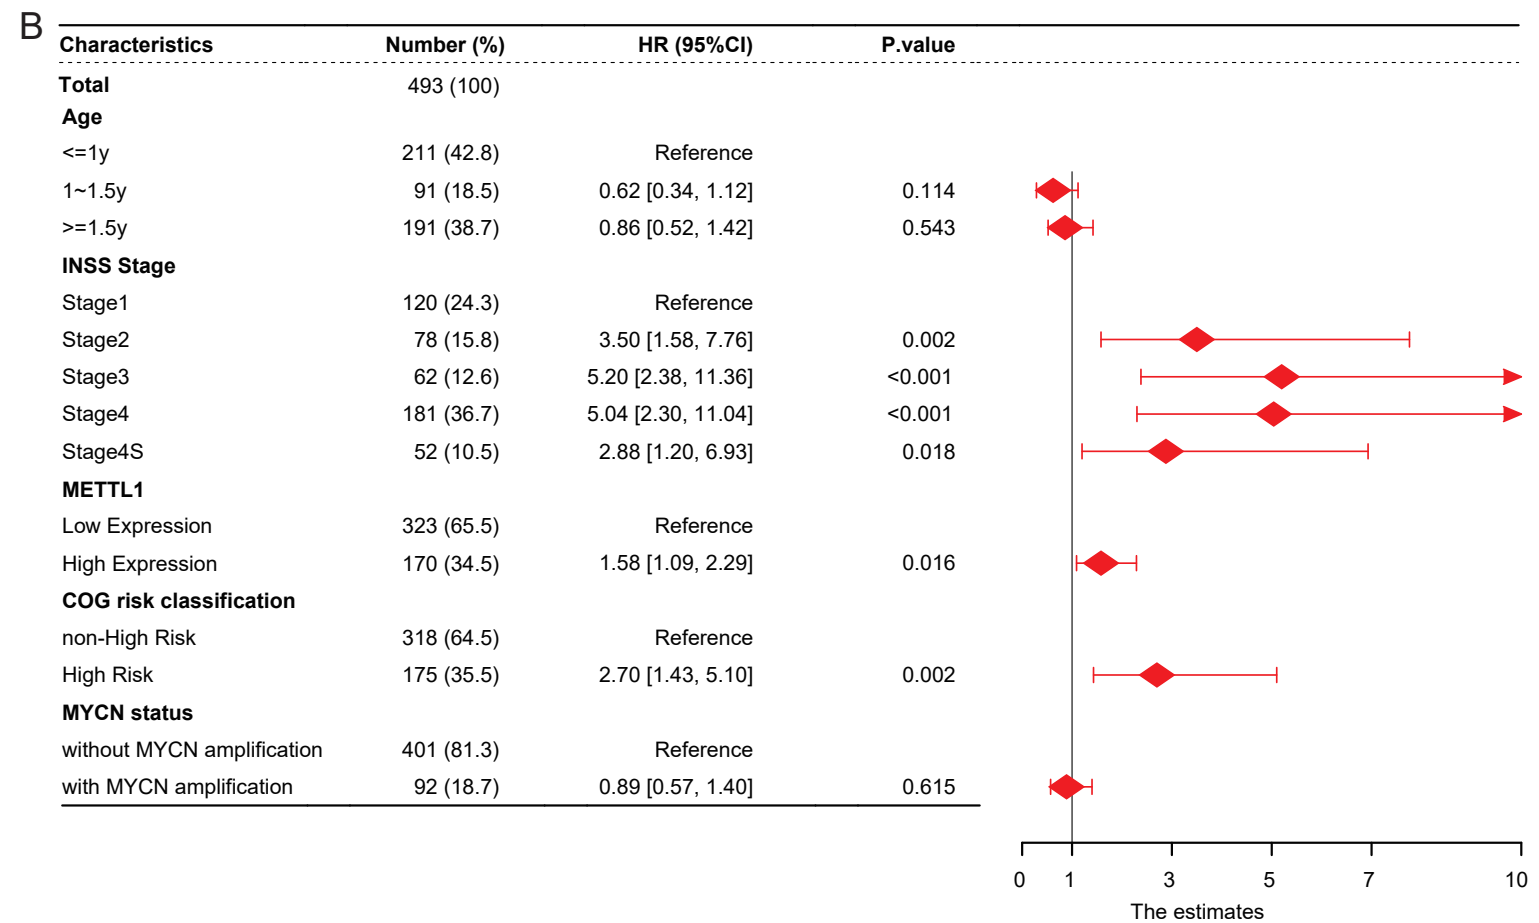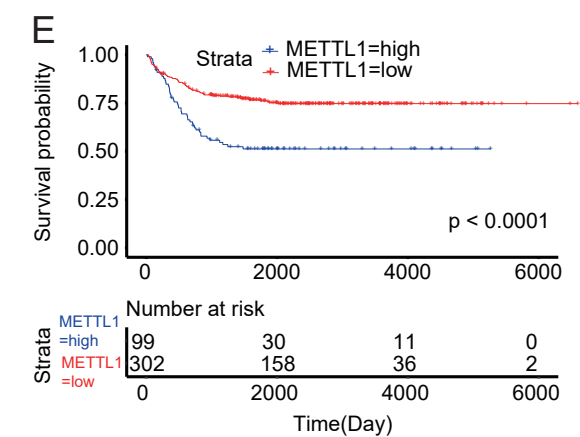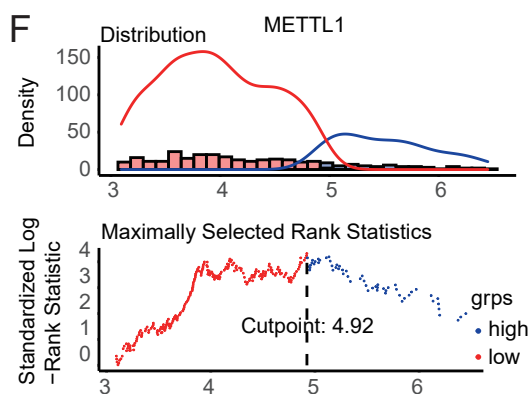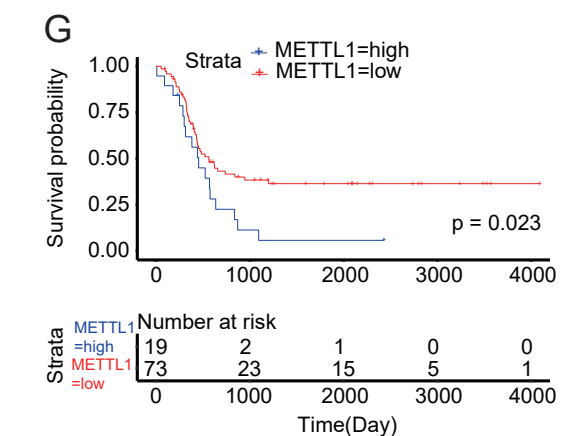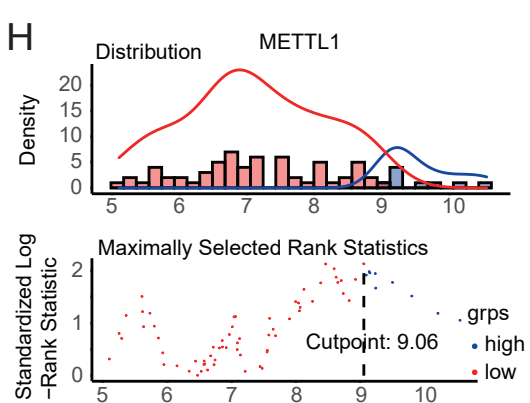

Supplement: 40364_2022_414_MOESM2_ESM.pdf [file 40364_2022_414_MOESM2_ESM.pdf]
